# Supplementary material
Source: publisher figshare collection journal article supplement (https://aacr.figshare.com/articles/dataset/_/23641371)
Supplement: Supplementary file 1 [file 41480637]

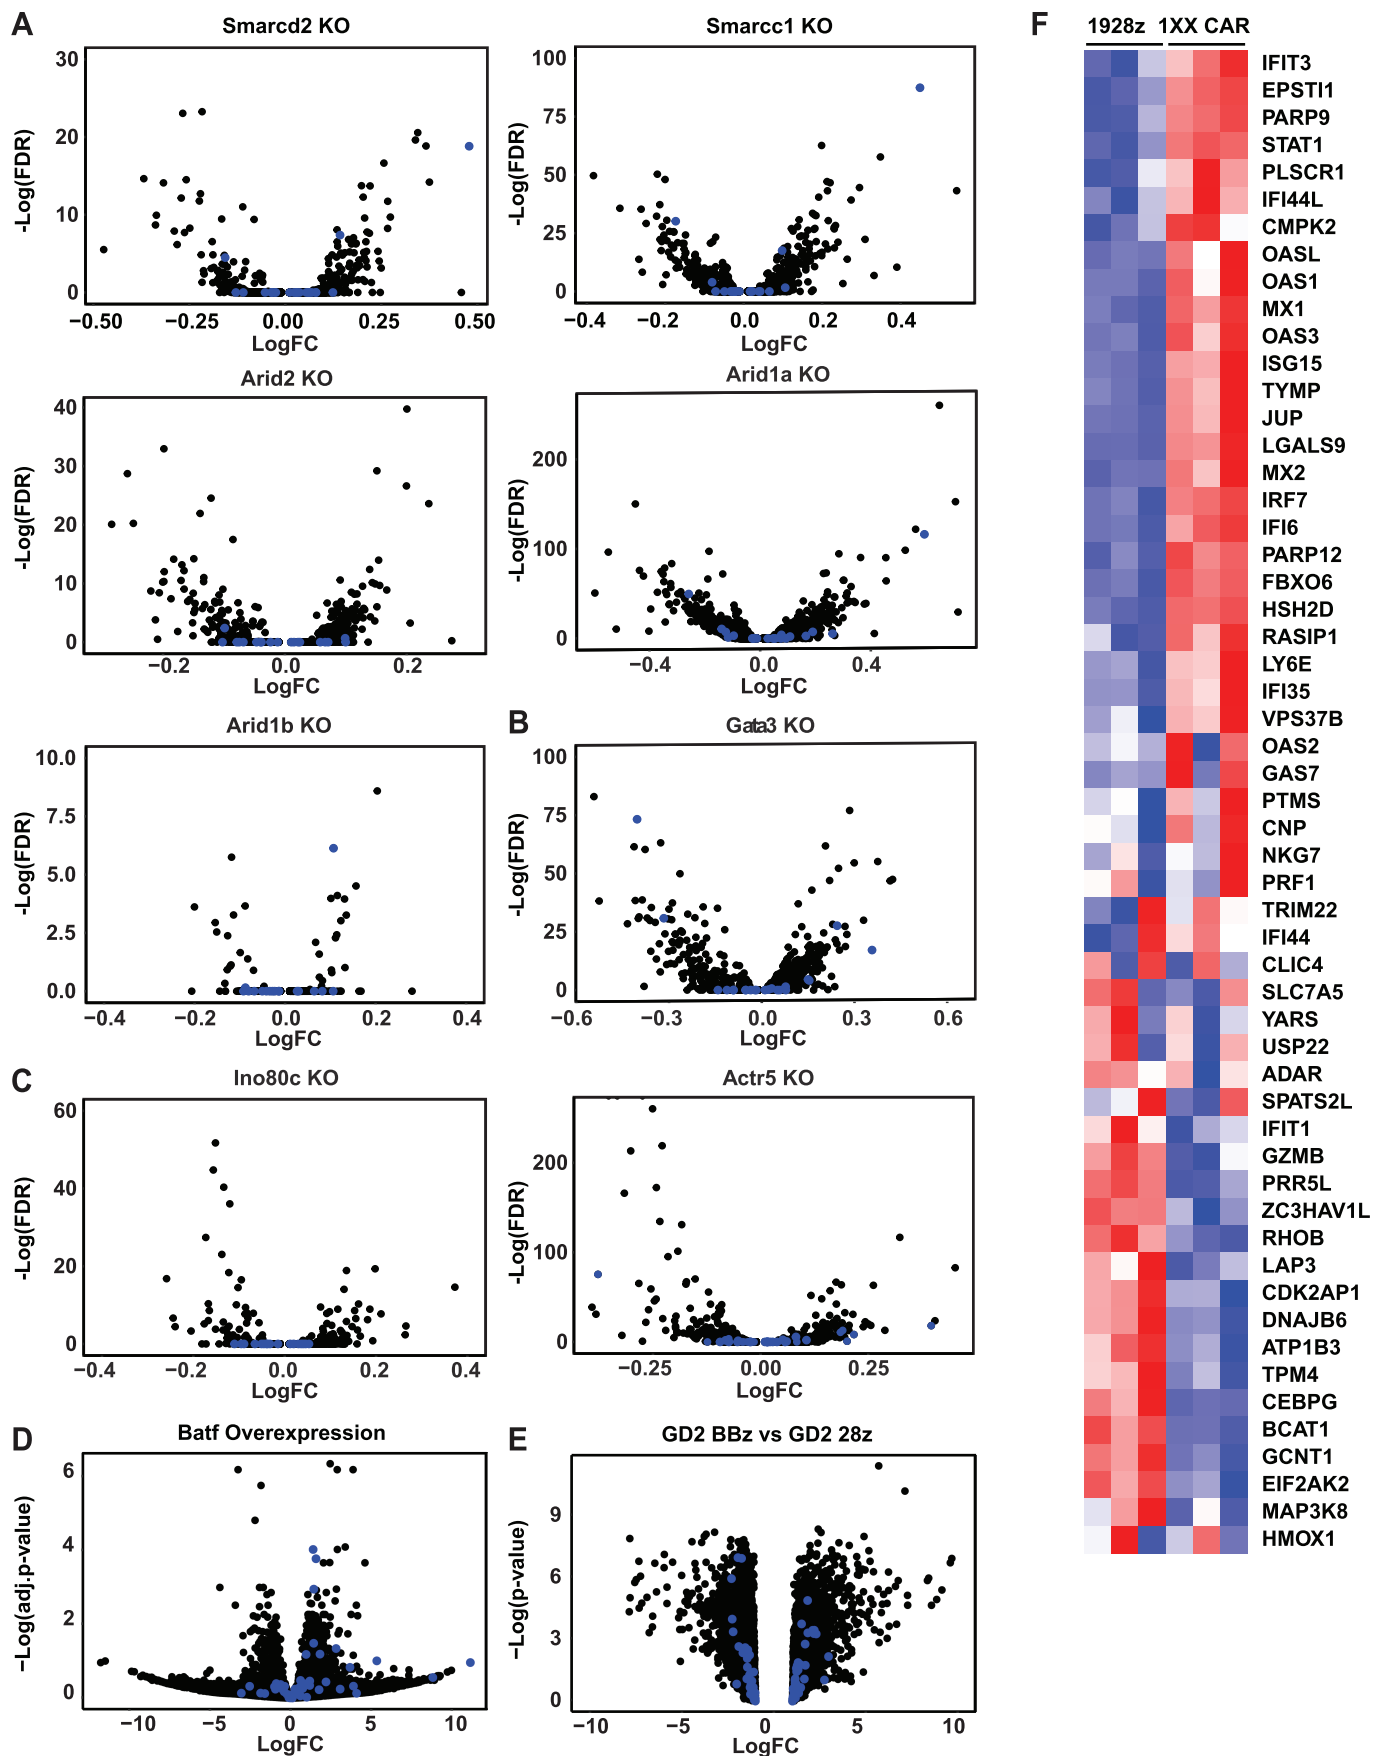

**Supplementary Figure 8. Comparison of Type I IFN gene expression in different CAR-T engineering approaches.** (A-F) show volcano plots and a heatmap of gene expression in engineered CAR T-cells, with type I IFN genes highlighted in blue. These data represent different CAR-T engineering approaches, including: BRG1/BRM-associated factors (BAF) complex, Gata3, INO80 complex knockout (PMID35750052), BATF overexpression (PMID34282330), 4-1BB- versus CD28-based GD2 CAR activity (PMID 25939063) and 1xx CD19 CAR T-cells (GSE121226). These plots allow for a comparison of the levels of type I IFN gene expression in each of these different CAR-T engineering methods.
